# Supplementary material
Source: PubMed Central journal article supplement (PMC6550022)
Supplement: develop-146-179036-s1.pdf [file develop-146-179036-s1.pdf]

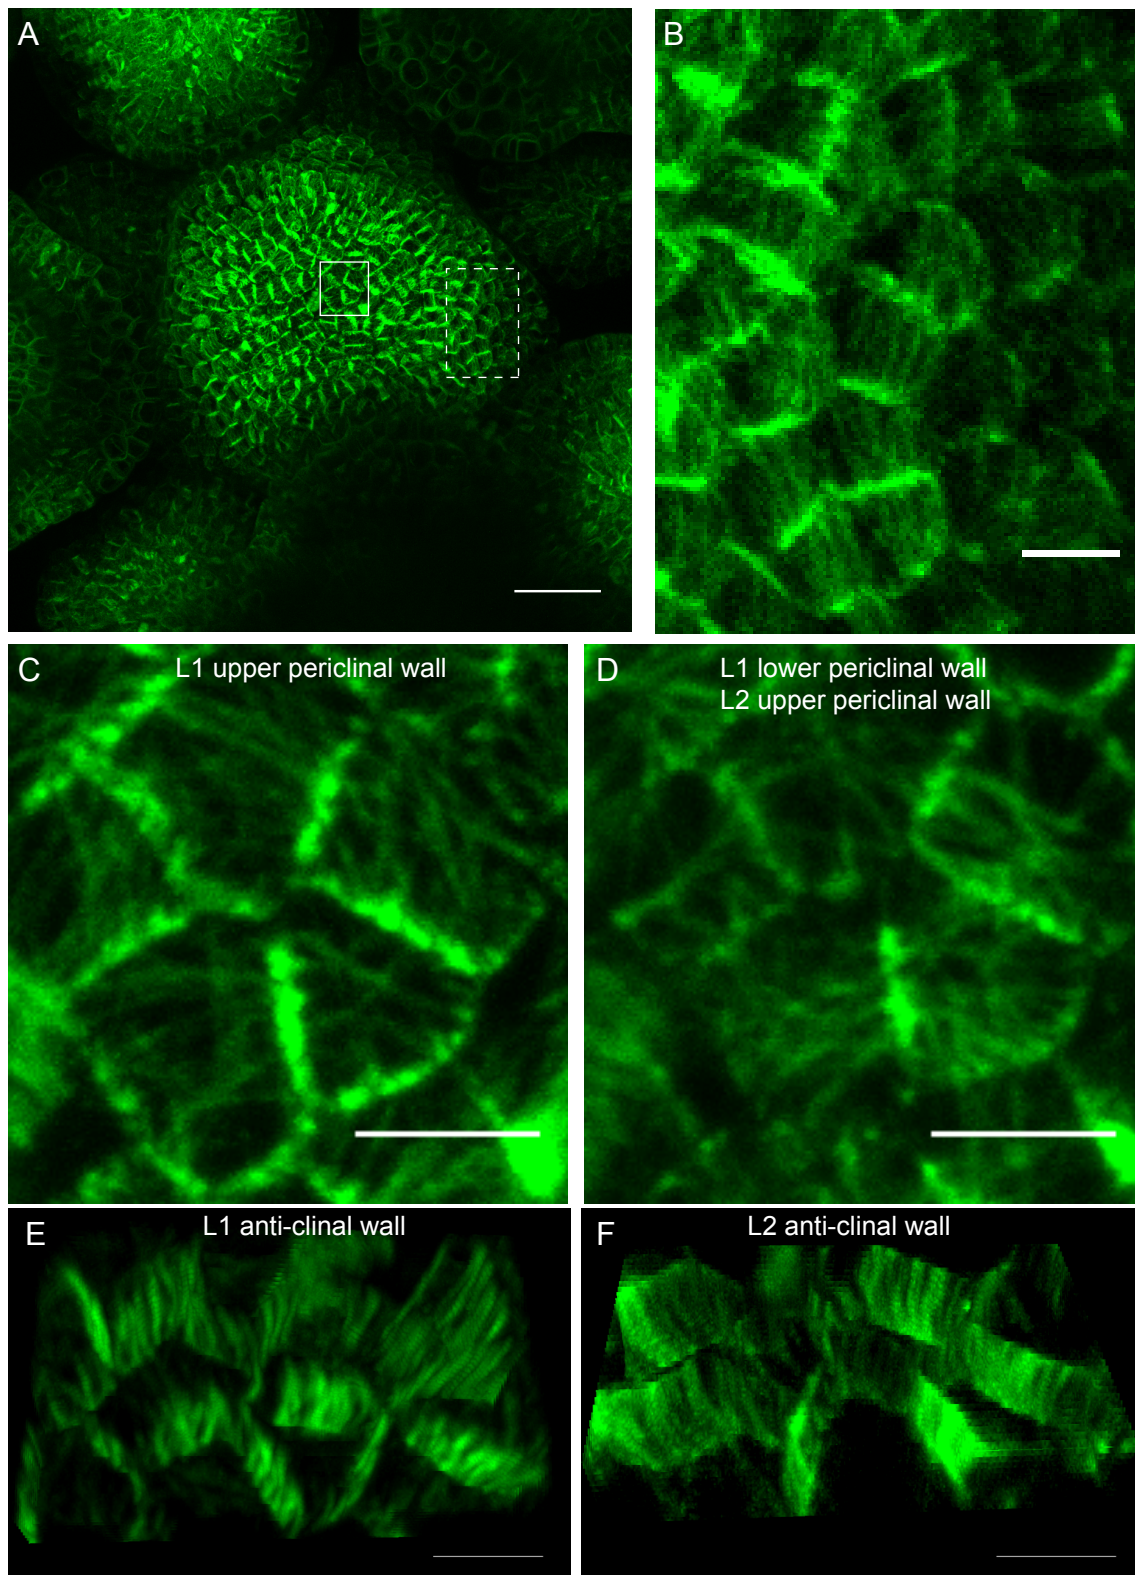

**Figure S1: Microtubule organization at the shoot apical meristem**

Maximum intensity projection of microtubule organization in the L1 layer of shoot apical meristem (A). Scale bar 50  $\mu\text{m}$ . Aligned microtubule arrays observed on the upper periclinal face of the margin domain (insert dotted box in A) (B). Random organization of microtubules observed on the periclinal face of central domain cells (insert box in A) (C). Projection images show disorganized microtubule arrays found in the lower periclinal face of the cells in the L1 and upper periclinal face of cells in L2 layer of the central domain (D). 3D lateral view of longitudinally aligned microtubules in L1 (E) and L2 (F) layers along the anticlinal face of cells in the central domain. Scale bars 5  $\mu\text{m}$

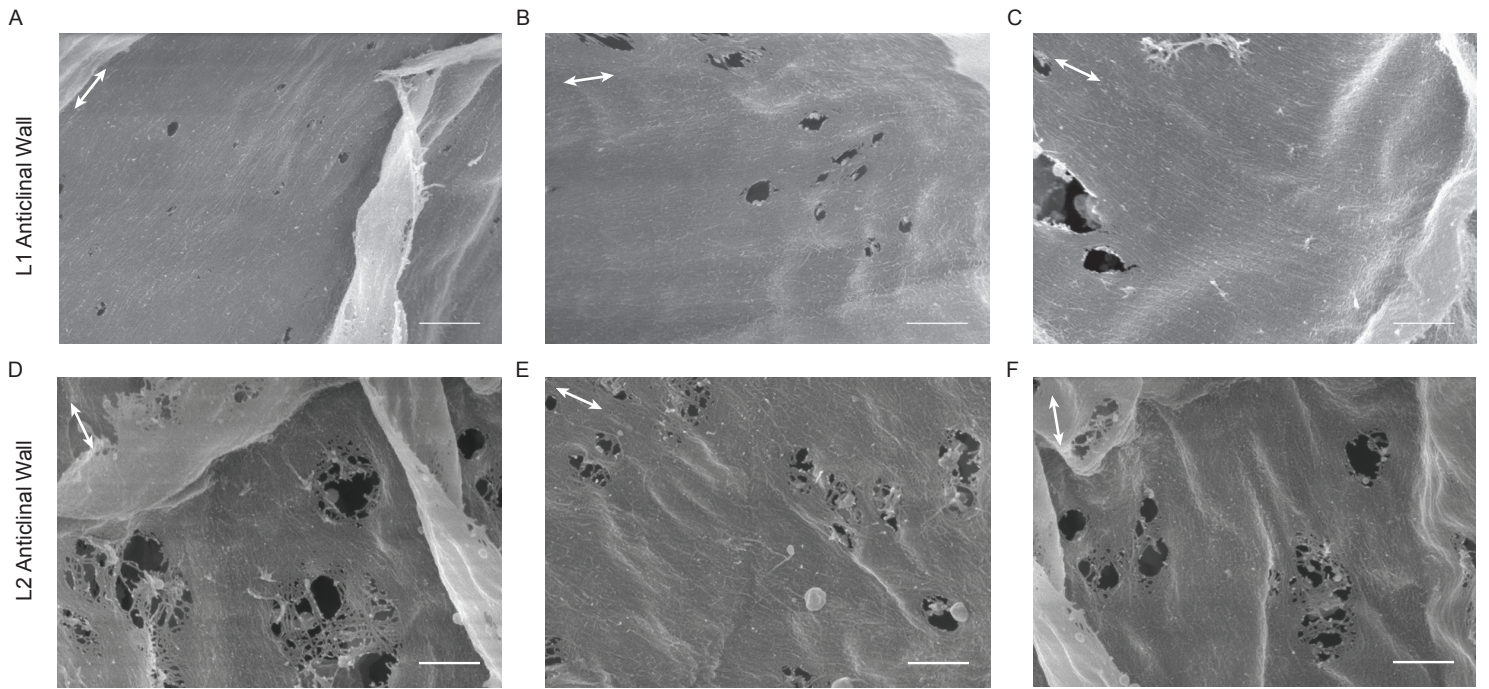

**Figure S2: Cellulose microfibril orientation at the anticlinal walls**

Longitudinal sections of cells in the central domain of shoot apical meristem. Representative images of cellulose microfibril orientations along the anticlinal wall in L1 (A-C) and L2 (D-F) cells. White lines with double arrows indicates cells longitudinal axis. Scale bars 500 nm.

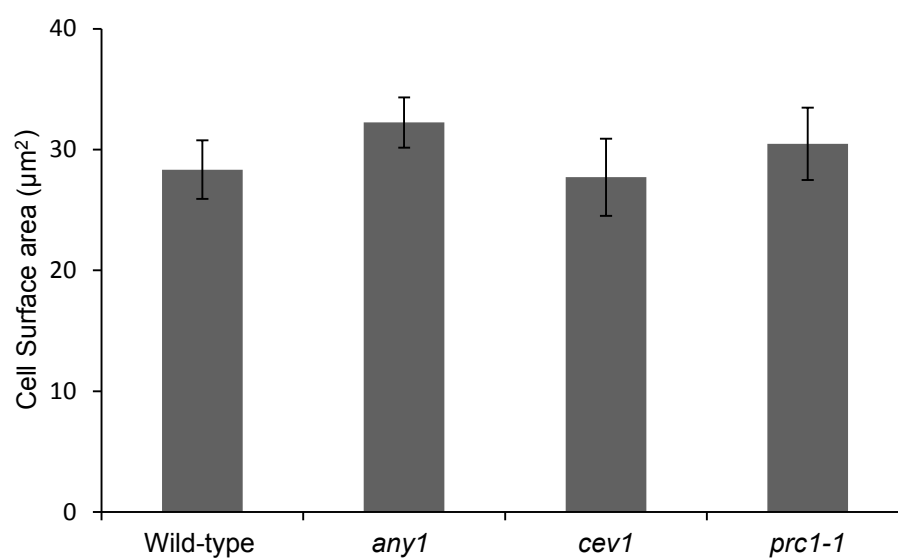

**Figure S3: Cell size is unaffected in cellulose synthase mutants**

Average cell size in the central zone cells of the different cellulose synthase mutants (N= Cells/shoot apical meristems, Wild-type=253/3, *any1*=199/3, *cev1*=145/4 and *prc1-1*=118/3)

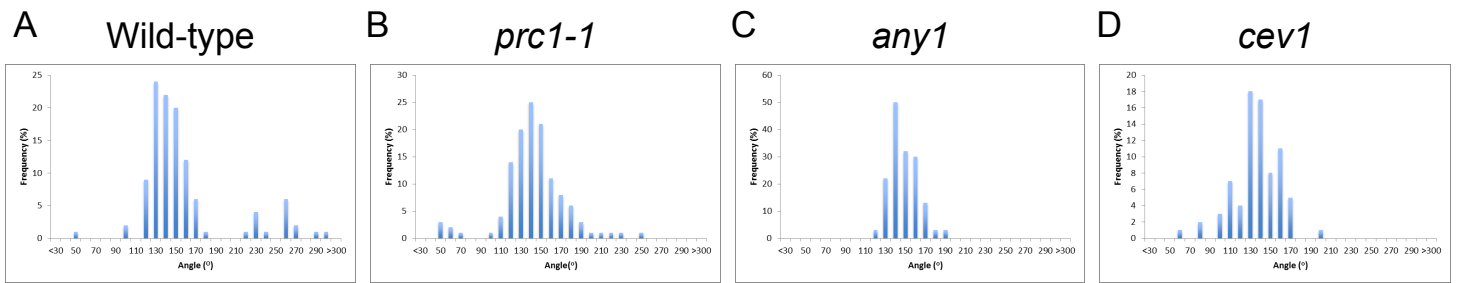

**Figure S4: Post meristematic phyllotactic patterning in cellulose synthase mutants**  
 Distribution of frequencies of divergence angles between successive siliques (A) in wild-type (n=113, 9 plants), (B) *prc1-1* (n=124, 8 plants), (C) *any1* (n=156, 8 plants) and (D) *cev1* (n=77, 7 plants).



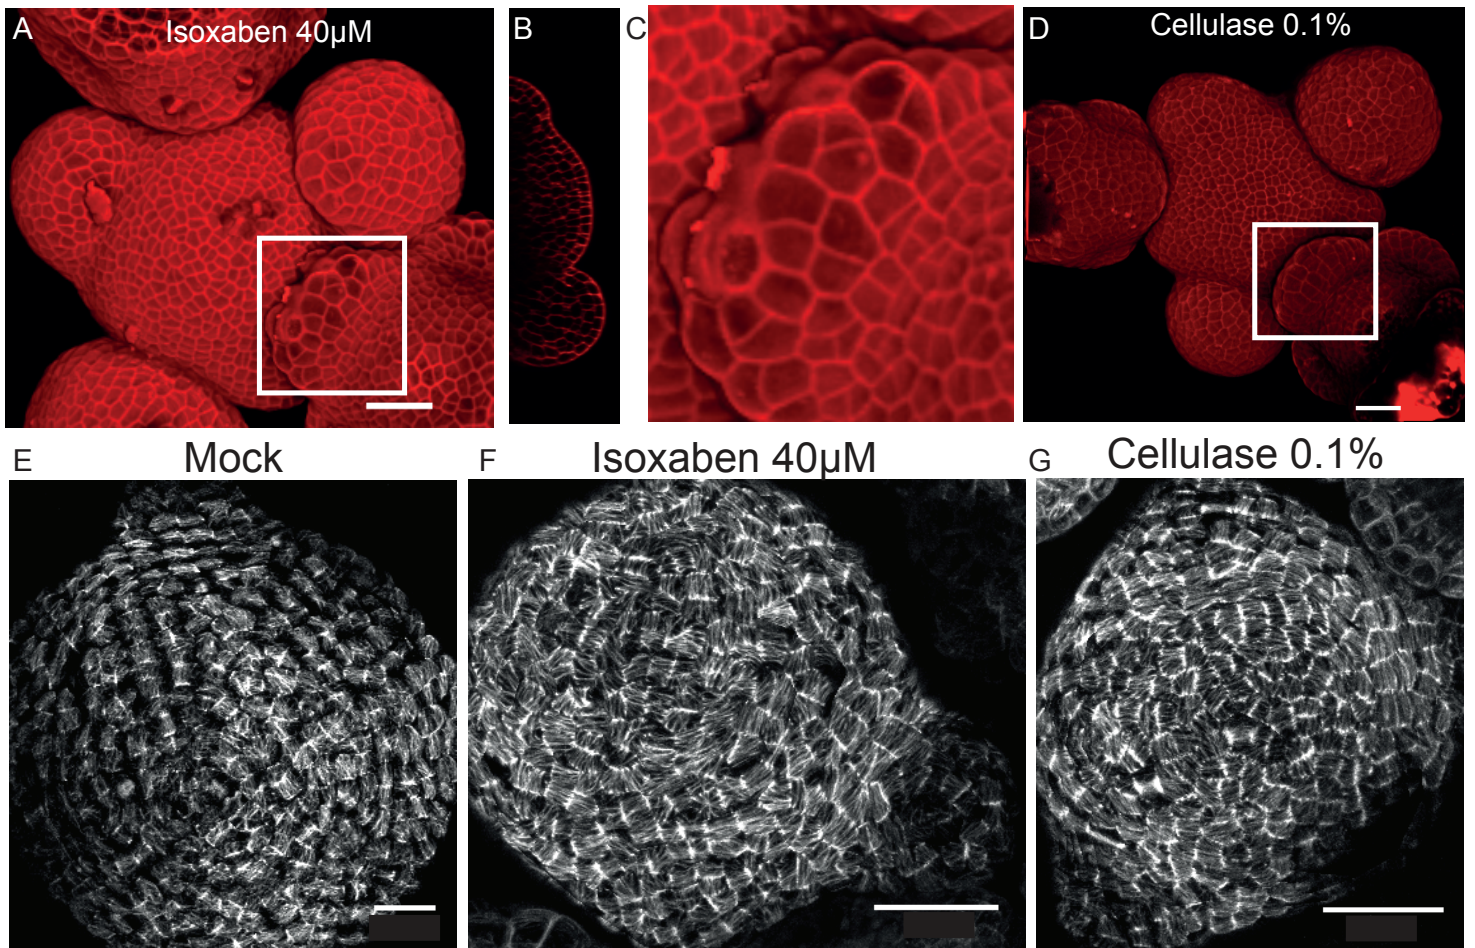

**Figure S5: Pharmacological and enzymatic disruption of cellulose:**

75 hrs treatment of wild-type shoot apical meristem with 40 μM isoxaben (A) Orthogonal view along the center of the shoot apical meristem (B) Enlarged image showing swelling of young sepal primordia insert (white box) in A (C) and 0.1% cellulase (D) treated shoot apical meristem for a period of 75 hrs. Swelling of young sepal primordia insert (white box). Microtubule organization in the L1 layer of MBD GFP lines expressing shoot apical meristem treated for 24 hrs with DMSO control (E) 40μM isoxaben (F) and 0.1% cellulase (G). Scale bars 25 μm.

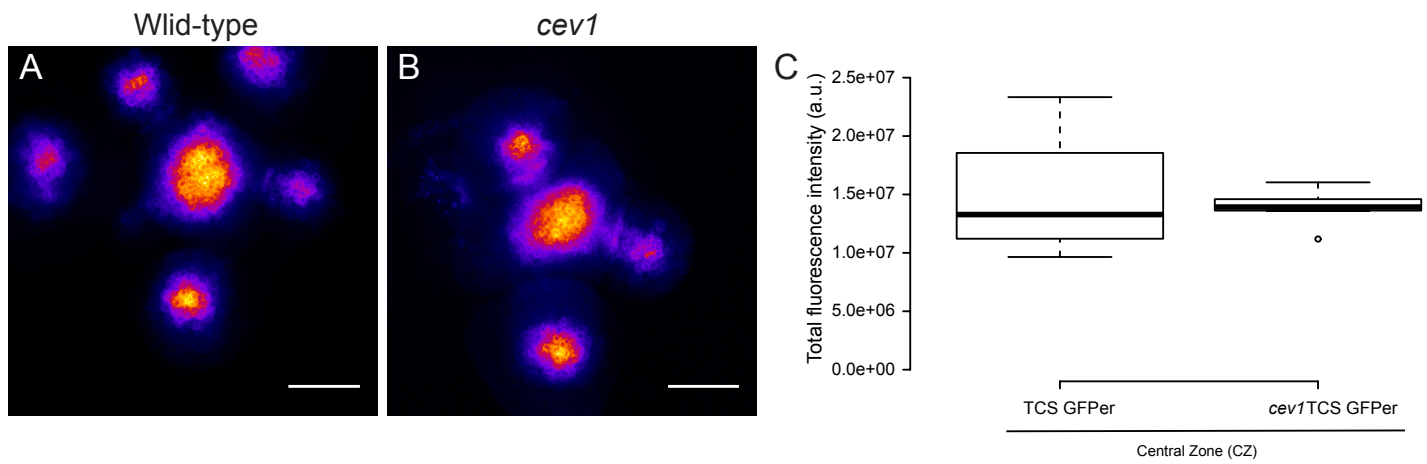

**Figure S6: Cytokinin status in wild-type and *cev1* mutant meristem**

Sum intensity projection of *pTCS:GFP* wild-type (A) and *cev1* (B). Box plots of total fluorescence intensity obtained from cells of the central zone (enclosure 25  $\mu$ m radius). (Wild-type N=5, *cev1* N=4 shoot apical meristems) (C). Scale bars 50  $\mu$ m. Center lines in box plots show the medians; box limits indicate the 25th and 75th percentiles as determined by R software; whiskers extend 1.5 times the interquartile range from the 25th and 75th percentiles, outliers are represented by dots.
